# Supplementary material for: Home to Hospital Live Streaming With Virtual Reality Goggles: A Qualitative Study Exploring the Experiences of Hospitalized Children
Source: PubMed Central journal article supplement (PMC6716480; doi:10.2196/pediatrics.9576), 2018-12-13
Supplement: pediatrics_v1i2e10_app1.pdf [file pediatrics_v1i2e10_app1.pdf]

# APPENDIX I

## INTERVIEW GUIDE

### Background

#### Topic

- Sub topic
  - Sample question

The order and content of the questions was adjusted to the age, sickness and concentration of each patient.

#### Interview A: before start of the experiment

- ❖ Introduction
  - Explanation research and interview
- ❖ Experience with hospitalization
  - Hospitalization frequency
    - Have you ever been hospitalized before? Can you tell me about that?
  - Reason for hospitalization
    - Do you know the reason for your hospitalization?
  - Experiences with hospitalization
    - What do you think about your hospitalization? What is it like to be in the hospital?
  - Interventions during hospitalization
    - What do you like in the hospital? What kind of things do you want to do in the hospital?
- ❖ Home
  - Not being home
    - What is it like not being at home?
  - Connection
    - Do you contact others while you're hospitalized? In what way?
- ❖ Virtual Reality
  - Experience
    - Have you used a VR device before? What was it like?
  - Expectations
    - What is your idea about the use of VisitU?
- ❖ Verbal member check
- ❖ Conclusion

#### Interview B: after the period in which the device could be used

- ❖ Introduction
  - Explanation research and interview
- ❖ Experience with hospitalization
  - Any question missed during interview A.
- ❖ Virtual Reality experiences
  - Usage
    - How often have you used the VR device? In what way have you been using VR? When did you use VR?
  - Practical
    - What was the usability of the VR goggles?
  - Physical
    - What happened with you physically when you used the VR goggles?
  - Presence
    - How real was the VR environment? In what way did you consider yourself being there?
  - Cognitive
    - What was using the VR goggles like? What thoughts came up in your mind? What would you tell your friends about these goggles?
  - Emotional

- What kind of feelings did you experience using VR?
- Social
  - Whom did you contact through VR goggles? What were your thoughts about that?
- Expectations
  - Did VR live stream meet your expectations?
- ❖ Parents view
  - Cognitive
    - What were your thoughts about the of VR use for your child?
  - Emotion
    - In what way affected VR your child?
  - Behavior
    - How did your child react using VR?
  - Practical
    - What were your experiences with using and installing VR live stream?
- ❖ Verbal member check
- ❖ Conclusion
